# Supplementary material
Source: PubMed Central journal article supplement (PMC5364056)

**Tumor Cell**

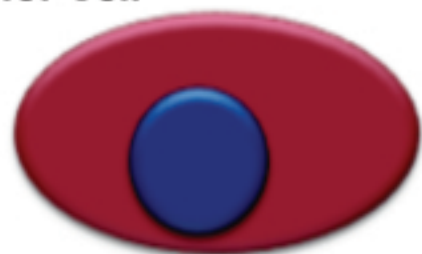

**TAMOXIFEN**

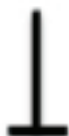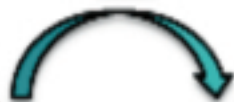

**Platelets**

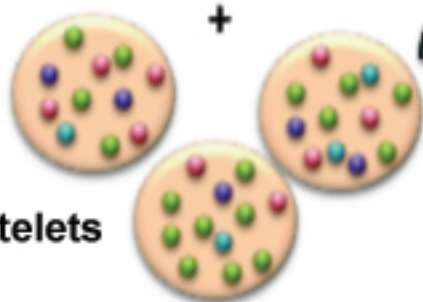

**Angiogenesis  
Metastasis**

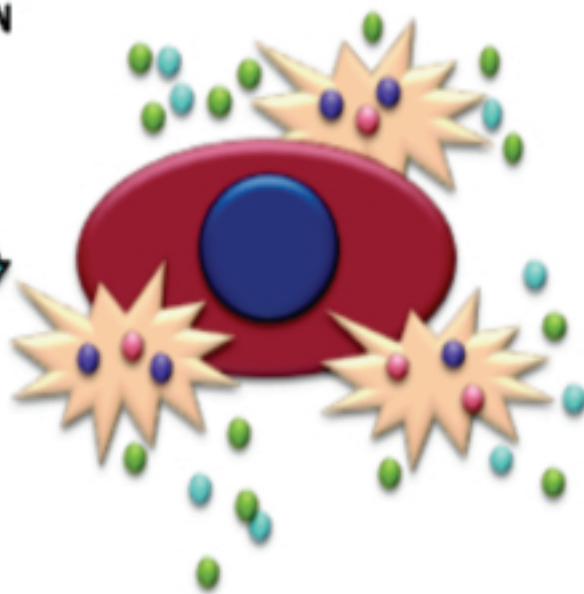

Supplement: NIHMS846253-supplement-Graphic_Abstract.pdf [file NIHMS846253-supplement-Graphic_Abstract.pdf]
